# Supplementary material for: Trench visualisation from a semiautonomous excavator with a base grid map using a TOF 2D profilometer
Source: Springer Nature journal article supplement (doi:10.1007/s12650-023-00908-4), 2023-02-06
Supplement: MOESM1 [file 23999462]

## Sheet: Taul1
	x	y	z
	54.8312	447.314	22.7439
	54.8193	447.314	22.7513
	54.812	447.312	22.7468
	54.8039	447.31	22.7443
	54.7941	447.31	22.7463
	54.7768	447.313	22.7678
	54.7654	447.314	22.7741
	54.7618	447.309	22.7598
	54.7508	447.309	22.7651
	54.7384	447.31	22.7743
	54.7317	447.308	22.7681
	54.7207	447.308	22.7737
	54.7049	447.311	22.7924
	54.6925	447.312	22.802
	54.6864	447.309	22.7943
	54.675	447.31	22.8013
	54.6678	447.307	22.7964
	54.6526	447.31	22.8145
	54.6445	447.309	22.8123
	54.6277	447.313	22.8352
	54.6125	447.316	22.8538
	54.5718	447.337	22.9475
	54.5551	447.341	22.972
	54.543	447.343	22.9829
	54.5377	447.34	22.9735
	54.531	447.337	22.9684
	54.5223	447.336	22.9693
	54.5149	447.335	22.9661
	54.5067	447.333	22.9655
	54.5017	447.33	22.9546
	54.4933	447.329	22.9542
	54.4814	447.33	22.9653
	54.474	447.328	22.9621
	54.4655	447.327	22.9621
	54.4585	447.325	22.9576
	54.4506	447.323	22.9555
	54.4447	447.32	22.947
	54.4357	447.32	22.949
	54.426	447.319	22.9531
	54.4203	447.316	22.9436
	54.4107	447.316	22.9474
	54.3975	447.319	22.964
	54.387	447.319	22.9713
	54.3734	447.323	22.9896
	54.3645	447.322	22.9916
	54.3581	447.319	22.9846
	54.3514	447.317	22.9786
	54.3421	447.317	22.9819
	54.3326	447.317	22.986
	54.3231	447.317	22.9904
	54.3164	447.314	22.9839
	54.3091	447.312	22.9797
	54.3008	447.311	22.9795
	54.2933	447.309	22.976
	54.2834	447.309	22.982
	54.2755	447.308	22.9803
	54.2641	447.309	22.9927
	54.2563	447.308	22.9904
	54.2455	447.309	23.0006
	54.2349	447.31	23.0099
	54.2285	447.307	23.0021
	54.2173	447.309	23.0143
	54.211	447.306	23.006
	54.2025	447.305	23.0065
	54.1955	447.303	23.0011
	54.1868	447.302	23.0027
	54.1779	447.302	23.0053
	54.1716	447.298	22.996
	54.1612	447.3	23.0058
	54.1536	447.298	23.0026
	54.1437	447.299	23.0104
	54.1347	447.299	23.0139
	54.127	447.297	23.0108
	54.1176	447.297	23.0163
	54.1105	447.295	23.0108
	54.1025	447.293	23.0092
	54.0941	447.292	23.01
	54.0844	447.293	23.0176
	54.0737	447.295	23.0305
	54.065	447.295	23.0332
	54.0557	447.295	23.039
	54.0495	447.291	23.0281
	54.0434	447.287	23.0159
	54.0352	447.286	23.0153
	54.0257	447.287	23.0229
	54.019	447.284	23.0137
	54.0111	447.282	23.0116
	54.0006	447.284	23.0253
	53.9919	447.284	23.0279
	53.9828	447.284	23.0339
	53.9745	447.283	23.0343
	53.9681	447.279	23.0226
	53.96	447.278	23.0214
	53.9508	447.279	23.0284
	53.9423	447.278	23.0304
	53.9338	447.278	23.032
	53.9255	447.277	23.0328
	53.9172	447.276	23.0334
	53.9101	447.273	23.0252
	53.902	447.271	23.0245
	53.894	447.27	23.0231
	53.8862	447.268	23.0196
	53.8784	447.266	23.0158
	53.871	447.263	23.0086
	53.862	447.264	23.0153
	53.8534	447.263	23.0181
	53.8455	447.261	23.0155
	53.8364	447.262	23.023
	53.8278	447.262	23.0267
	53.8203	447.259	23.0195
	53.8128	447.257	23.0129
	53.8043	447.256	23.0148
	53.7959	447.255	23.017
	53.7882	447.253	23.0108
	53.7795	447.253	23.016
	53.7713	447.252	23.016
	53.7635	447.25	23.0108
	53.7547	447.25	23.0182
	53.7474	447.246	23.0064
	53.7397	447.243	22.9984
	53.7312	447.243	23.0016
	53.7232	447.241	22.9988
	53.7149	447.24	22.9984
	53.7066	447.239	22.9994
	53.6986	447.237	22.9948
	53.69	447.237	23.0002
	53.6817	447.236	23.0005
	53.6733	447.236	23.0036
	53.665	447.235	23.0042
	53.6569	447.233	23.0005
	53.6489	447.23	22.9942
	53.6404	447.23	22.9993
	53.6323	447.228	22.9957
	53.624	447.227	22.9965
	53.6158	447.226	22.9966
	53.6074	447.226	22.9993
	53.5991	447.225	22.9998
	53.5909	447.223	22.9972
	53.5825	447.224	23.0043
	53.5742	447.223	23.0043
	53.566	447.222	23.0057
	53.5579	447.219	22.9986
	53.5495	447.22	23.0063
	53.5412	447.219	23.0063
	53.5331	447.217	23.0015
	53.5248	447.215	22.9981
	53.5166	447.213	22.9938
	53.5083	447.21	22.9889
	53.5001	447.209	22.9884
	53.4918	447.208	22.987
	53.4834	447.202	22.9704
	53.4751	447.201	22.9713
	53.4667	447.199	22.9683
	53.4584	447.198	22.9684
	53.4498	447.193	22.955
	53.4416	447.194	22.9602
	53.4332	447.193	22.96
	53.425	447.193	22.9642
	53.417	447.196	22.9787
	53.4089	447.196	22.9853
	53.4008	447.196	22.9883
	53.3927	447.197	22.9939
	53.3841	447.193	22.9839
	53.376	447.194	22.9903
	53.3678	447.193	22.9911
	53.3595	447.191	22.9906
	53.3509	447.188	22.9837
	53.3427	447.188	22.985
	53.3347	447.188	22.9891
	53.3253	447.181	22.9703
	53.3167	447.179	22.9647
	53.3085	447.178	22.9662
	53.3001	447.177	22.9662
	53.2918	447.176	22.9659
	53.2832	447.174	22.9621
	53.2745	447.171	22.9566
	53.2662	447.17	22.9579
	53.257	447.166	22.9459
	53.2477	447.162	22.9352
	53.2393	447.16	22.9352
	53.2307	447.158	22.9322
	53.2226	447.158	22.9354
	53.213	447.154	22.923
	53.2051	447.154	22.9284
	53.1959	447.151	22.9201
	53.1876	447.15	22.9217
	53.1791	447.149	22.921
	53.1706	447.147	22.9202
	53.1626	447.147	22.9239
	53.1534	447.144	22.9172
	53.1469	447.148	22.9344
	53.1387	447.147	22.9357
	53.1288	447.143	22.9235
	53.121	447.143	22.928
	53.1128	447.142	22.9295
	53.1039	447.14	22.9262
	53.0957	447.14	22.9273
	53.0907	447.146	22.9537
	53.0851	447.151	22.9736
	53.0772	447.151	22.9763
	53.0708	447.154	22.9902
	53.0628	447.153	22.9919
	53.0555	447.154	22.9984
	53.0481	447.155	23.004
	53.0407	447.155	23.0091
	53.0308	447.151	22.9979
	53.0229	447.15	22.9994
	53.0137	447.147	22.9936
	53.0055	447.146	22.9933
	52.9972	447.145	22.993
	52.9891	447.144	22.9936
	52.9788	447.139	22.9812
	52.9693	447.136	22.9742
	52.9624	447.137	22.9819
	52.9532	447.135	22.9765
	52.942	447.129	22.9599
	52.9312	447.124	22.9463
	52.9234	447.123	22.9492
	52.9142	447.121	22.9444
	52.9055	447.119	22.9426
	52.896	447.116	22.9367
	52.8846	447.11	22.9211
	52.8761	447.109	22.9204
	52.8652	447.104	22.908
	52.8542	447.099	22.8955
	52.8386	447.088	22.8608
	52.8295	447.086	22.8583
	52.8189	447.082	22.8488
	52.8088	447.078	22.8414
	52.7977	447.074	22.8301
	52.788	447.071	22.825
	52.7757	447.065	22.8084
	52.7663	447.063	22.8056
	52.7567	447.061	22.8015
	52.7471	447.058	22.7976
	52.7362	447.054	22.7882
	52.7237	447.048	22.772
	52.7162	447.049	22.7777
	52.7076	447.048	22.7784
	52.7023	447.051	22.7926
	52.6868	447.041	22.7649
	52.6781	447.04	22.7652
	52.6668	447.036	22.7554
	52.6546	447.031	22.742
	52.6456	447.029	22.7413
	52.6336	447.024	22.7292
	52.6265	447.025	22.7362
	52.6154	447.022	22.7276
	52.608	447.022	22.7332
	52.5984	447.02	22.7305
	52.5902	447.02	22.7331
	52.5846	447.022	22.7449
	52.5732	447.018	22.7358
	52.5697	447.023	22.7551
	52.5555	447.016	22.7358
	52.5421	447.01	22.7201
	54.8332	447.319	22.7405
	54.8239	447.318	22.7413
	54.81	447.319	22.7537
	54.8015	447.318	22.7523
	54.796	447.315	22.7432
	54.7755	447.32	22.7729
	54.7654	447.32	22.7759
	54.7577	447.318	22.7728
	54.7498	447.316	22.7697
	54.7409	447.315	22.7695
	54.7319	447.314	22.7696
	54.7146	447.318	22.7924
	54.7091	447.314	22.7828
	54.6938	447.317	22.8005
	54.6899	447.313	22.7865
	54.6758	447.315	22.8012
	54.6676	447.313	22.7992
	54.6555	447.314	22.8084
	54.6425	447.316	22.8204
	54.6295	447.318	22.8324
	54.6164	447.319	22.845
	54.5695	447.344	22.9577
	54.5579	447.345	22.9672
	54.5462	447.346	22.9769
	54.5369	447.346	22.9796
	54.5313	447.343	22.9709
	54.5213	447.343	22.9757
	54.5175	447.339	22.9616
	54.5067	447.339	22.9689
	54.4998	447.337	22.9641
	54.4928	447.335	22.9595
	54.4857	447.333	22.955
	54.4779	447.331	22.9528
	54.4665	447.332	22.9626
	54.4586	447.331	22.9607
	54.4526	447.328	22.9527
	54.4436	447.327	22.9545
	54.4361	447.325	22.951
	54.4266	447.325	22.9547
	54.4219	447.321	22.9418
	54.4073	447.325	22.963
	54.3987	447.324	22.9636
	54.3862	447.326	22.9781
	54.3734	447.329	22.9939
	54.3657	447.327	22.9916
	54.3583	447.325	22.9877
	54.3508	447.323	22.9848
	54.3411	447.323	22.9895
	54.3337	447.321	22.9862
	54.3253	447.32	22.9861
	54.318	447.318	22.9821
	54.3079	447.319	22.9886
	54.3008	447.316	22.9839
	54.2932	447.315	22.9807
	54.2826	447.316	22.9895
	54.2749	447.314	22.9869
	54.2674	447.312	22.9837
	54.2558	447.314	22.997
	54.2486	447.312	22.992
	54.2371	447.314	23.0056
	54.2297	447.312	23.0015
	54.2198	447.313	23.0085
	54.2118	447.311	23.0072
	54.2038	447.31	23.0059
	54.1957	447.309	23.0049
	54.1882	447.307	23.0013
	54.1803	447.305	22.9992
	54.1725	447.303	22.9967
	54.1619	447.305	23.0079
	54.1545	447.303	23.0036
	54.146	447.302	23.0045
	54.1358	447.303	23.0139
	54.1275	447.302	23.0137
	54.1197	447.3	23.0113
	54.113	447.297	23.0034
	54.1037	447.298	23.0086
	54.0949	447.297	23.0113
	54.086	447.297	23.0145
	54.0755	447.299	23.0264
	54.0668	447.298	23.029
	54.0577	447.299	23.0338
	54.0518	447.294	23.0206
	54.0435	447.293	23.0209
	54.0379	447.288	23.0058
	54.0267	447.291	23.0228
	54.0202	447.288	23.0126
	54.0113	447.288	23.0162
	54.0023	447.288	23.0211
	53.994	447.287	23.021
	53.9861	447.285	23.0188
	53.9773	447.285	23.0223
	53.9698	447.283	23.0177
	53.9618	447.281	23.0159
	53.9526	447.282	23.0223
	53.9434	447.282	23.0291
	53.9354	447.281	23.0279
	53.9263	447.282	23.0341
	53.9189	447.279	23.0285
	53.9102	447.279	23.0315
	53.9027	447.276	23.0263
	53.8954	447.273	23.019
	53.8879	447.271	23.0132
	53.8796	447.27	23.0136
	53.8707	447.27	23.0191
	53.8629	447.268	23.0152
	53.8539	447.269	23.0217
	53.8467	447.265	23.012
	53.8376	447.266	23.0205
	53.829	447.266	23.0232
	53.821	447.264	23.0216
	53.8131	447.262	23.0183
	53.8054	447.26	23.0127
	53.797	447.259	23.0139
	53.7891	447.257	23.0102
	53.7807	447.256	23.0115
	53.7722	447.256	23.015
	53.7648	447.252	23.0051
	53.7558	447.254	23.0142
	53.748	447.251	23.0084
	53.7407	447.247	22.9961
	53.7317	447.248	23.0054
	53.724	447.245	22.9969
	53.7152	447.246	23.0045
	53.7069	447.245	23.0049
	53.6992	447.242	22.9966
	53.6904	447.243	23.0047
	53.6823	447.241	23.0022
	53.6741	447.24	23.0013
	53.6657	447.239	23.0031
	53.6578	447.236	22.9961
	53.6496	447.235	22.9944
	53.6413	447.233	22.9945
	53.633	447.232	22.9939
	53.6249	447.23	22.9889
	53.6163	447.231	22.9977
	53.6081	447.23	22.9977
	53.5998	447.229	22.9977
	53.5915	447.228	22.9968
	53.583	447.229	23.0069
	53.5751	447.225	22.9936
	53.5665	447.228	23.0104
	53.5585	447.223	22.995
	53.5501	447.224	23.005
	53.5418	447.223	23.0043
	53.5336	447.221	23.002
	53.5254	447.219	22.9969
	53.5171	447.218	22.9976
	53.5088	447.216	22.9932
	53.5005	447.214	22.9905
	53.4922	447.211	22.9826
	53.4838	447.207	22.9745
	53.4754	447.204	22.9669
	53.467	447.201	22.9606
	53.4587	447.202	22.9652
	53.4501	447.197	22.9515
	53.442	447.199	22.9638
	53.4335	447.197	22.9591
	53.4255	447.199	22.9719
	53.4175	447.201	22.9841
	53.4091	447.199	22.9803
	53.4012	447.202	22.9923
	53.3929	447.2	22.9891
	53.3847	447.2	22.9926
	53.3763	447.198	22.9901
	53.3681	447.197	22.9916
	53.3599	447.196	22.9925
	53.3515	447.195	22.9905
	53.343	447.192	22.9848
	53.3347	447.191	22.9843
	53.3258	447.187	22.9745
	53.3175	447.186	22.974
	53.3089	447.183	22.9694
	53.2999	447.179	22.9599
	53.2921	447.181	22.9676
	53.283	447.177	22.9577
	53.2746	447.175	22.9568
	53.2663	447.174	22.9568
	53.2572	447.17	22.9472
	53.2475	447.165	22.9311
	53.2396	447.165	22.9373
	53.2311	447.164	22.937
	53.2224	447.162	22.933
	53.2137	447.16	22.9306
	53.2047	447.157	22.9245
	53.1957	447.155	22.919
	53.188	447.155	22.9254
	53.1796	447.154	22.9257
	53.171	447.153	22.9241
	53.1635	447.154	22.9329
	53.1552	447.153	22.9338
	53.1482	447.156	22.946
	53.1396	447.154	22.9448
	53.1302	447.151	22.9355
	53.1211	447.148	22.9297
	53.1135	447.149	22.9369
	53.1045	447.146	22.9322
	53.096	447.145	22.9314
	53.0895	447.148	22.9452
	53.0852	447.156	22.9755
	53.0771	447.155	22.9771
	53.0696	447.156	22.9827
	53.0628	447.158	22.993
	53.0555	447.158	22.9991
	53.048	447.159	23.0038
	53.0406	447.159	23.0092
	53.0315	447.157	23.0036
	53.0235	447.156	23.0045
	53.0134	447.151	22.9925
	53.0045	447.149	22.9885
	52.9985	447.152	23.0026
	52.9888	447.148	22.9933
	52.9799	447.146	22.9896
	52.9693	447.141	22.9759
	52.9616	447.141	22.9791
	52.9535	447.14	22.98
	52.9425	447.134	22.9647
	52.9332	447.132	22.9594
	52.9235	447.128	22.9522
	52.9155	447.128	22.9537
	52.904	447.122	22.9374
	52.8972	447.123	22.9455
	52.887	447.119	22.936
	52.8771	447.116	22.9284
	52.8638	447.107	22.9041
	52.8565	447.108	22.9097
	52.8413	447.097	22.8771
	52.8297	447.091	22.8624
	52.8193	447.088	22.8537
	52.8095	447.085	22.8482
	52.7984	447.08	22.8366
	52.7895	447.079	22.8354
	52.7769	447.072	22.818
	52.7671	447.07	22.8129
	52.7567	447.066	22.8051
	52.7477	447.065	22.8042
	52.7345	447.058	22.7849
	52.7248	447.055	22.781
	52.7146	447.052	22.775
	52.7088	447.055	22.7874
	52.7005	447.054	22.7894
	52.6873	447.048	22.7713
	52.6782	447.046	22.7702
	52.6649	447.039	22.7521
	52.6541	447.036	22.7445
	52.6437	447.033	22.7384
	52.6374	447.035	22.7485
	52.6255	447.03	22.7368
	52.6179	447.03	22.7416
	52.6085	447.029	22.7399
	52.5995	447.027	22.7395
	52.5927	447.029	22.7467
	52.583	447.027	22.7438
	52.5731	447.024	22.7403
	52.567	447.026	22.7498
	52.5544	447.021	22.7366
	52.5473	447.022	22.743
	54.8283	447.326	22.7581
	54.818	447.326	22.7613
	54.8102	447.324	22.7582
	54.7991	447.324	22.7636
	54.7897	447.323	22.7644
	54.7783	447.323	22.7707
	54.7662	447.324	22.7789
	54.754	447.324	22.7874
	54.7503	447.32	22.7732
	54.7355	447.322	22.7891
	54.7337	447.317	22.7695
	54.716	447.321	22.7935
	54.705	447.321	22.7992
	54.695	447.321	22.802
	54.6855	447.32	22.8035
	54.6765	447.319	22.8038
	54.6654	447.319	22.8102
	54.6534	447.32	22.819
	54.6429	447.32	22.8238
	54.6297	447.321	22.8364
	54.6089	447.328	22.8717
	54.5657	447.351	22.974
	54.5535	447.352	22.9852
	54.5439	447.352	22.9887
	54.5355	447.351	22.9885
	54.5278	447.349	22.9863
	54.5226	447.346	22.9766
	54.5107	447.347	22.9872
	54.5056	447.343	22.9769
	54.4981	447.342	22.9739
	54.4896	447.341	22.9742
	54.4836	447.338	22.9664
	54.4752	447.337	22.9661
	54.4657	447.336	22.9694
	54.4569	447.335	22.9705
	54.45	447.333	22.9653
	54.4423	447.331	22.9627
	54.4359	447.329	22.9557
	54.4251	447.329	22.9637
	54.4158	447.329	22.9668
	54.407	447.328	22.9677
	54.3951	447.33	22.9801
	54.3822	447.333	22.9959
	54.3723	447.333	23.0014
	54.3645	447.331	22.9992
	54.3567	447.33	22.9974
	54.3491	447.328	22.9945
	54.3402	447.327	22.9965
	54.3329	447.325	22.9925
	54.3221	447.326	23.0015
	54.3165	447.323	22.9911
	54.3083	447.321	22.9901
	54.2998	447.32	22.9906
	54.2911	447.32	22.9921
	54.2844	447.317	22.9854
	54.273	447.319	22.9973
	54.2651	447.317	22.9956
	54.2559	447.317	22.9989
	54.2473	447.316	23.0001
	54.2369	447.317	23.0086
	54.2284	447.316	23.0097
	54.2214	447.314	23.0036
	54.2103	447.316	23.0159
	54.2039	447.312	23.0073
	54.1966	447.31	23.0028
	54.1877	447.31	23.0053
	54.1801	447.308	23.002
	54.1713	447.307	23.0041
	54.1611	447.308	23.013
	54.1535	447.306	23.0093
	54.1446	447.306	23.0124
	54.1354	447.306	23.0165
	54.1274	447.305	23.0151
	54.1197	447.303	23.0121
	54.1116	447.301	23.0113
	54.1026	447.301	23.0147
	54.0946	447.3	23.0128
	54.0846	447.301	23.0219
	54.0736	447.303	23.0367
	54.0655	447.302	23.0362
	54.0562	447.303	23.042
	54.0496	447.299	23.0328
	54.0428	447.296	23.0245
	54.0359	447.293	23.0165
	54.0246	447.296	23.034
	54.0189	447.291	23.0191
	54.0107	447.29	23.0187
	54.0007	447.292	23.0292
	53.9939	447.288	23.0201
	53.9849	447.288	23.0245
	53.9763	447.288	23.0267
	53.9689	447.285	23.0211
	53.9603	447.285	23.023
	53.9509	447.286	23.0313
	53.9427	447.285	23.0306
	53.9345	447.283	23.0302
	53.9261	447.283	23.0319
	53.9175	447.282	23.0341
	53.9098	447.28	23.0303
	53.9014	447.28	23.0316
	53.8938	447.277	23.0267
	53.8857	447.276	23.0246
	53.878	447.273	23.0202
	53.8695	447.273	23.0225
	53.8604	447.274	23.0297
	53.8533	447.27	23.0191
	53.8448	447.27	23.022
	53.8356	447.271	23.0302
	53.8278	447.269	23.0265
	53.8189	447.269	23.0328
	53.8112	447.266	23.0269
	53.8037	447.264	23.02
	53.795	447.264	23.0244
	53.7869	447.262	23.0225
	53.779	447.26	23.0191
	53.7708	447.259	23.0182
	53.7629	447.256	23.0128
	53.7538	447.258	23.0241
	53.746	447.256	23.0182
	53.7388	447.251	23.003
	53.7302	447.251	23.0083
	53.7215	447.251	23.0139
	53.7134	447.25	23.0119
	53.705	447.249	23.0129
	53.697	447.246	23.008
	53.6884	447.247	23.0146
	53.6805	447.244	23.0065
	53.6721	447.244	23.0098
	53.6638	447.243	23.0103
	53.6557	447.24	23.0056
	53.6477	447.238	22.999
	53.6395	447.236	22.9974
	53.6309	447.237	23.0046
	53.6227	447.236	23.0036
	53.6144	447.234	23.0019
	53.606	447.234	23.0059
	53.5979	447.231	23.0004
	53.5896	447.231	23.0016
	53.5811	447.232	23.0096
	53.5728	447.23	23.0077
	53.5644	447.231	23.0146
	53.5563	447.227	23.0057
	53.548	447.228	23.011
	53.5397	447.228	23.0148
	53.5315	447.225	23.0099
	53.5232	447.224	23.0092
	53.5149	447.222	23.0038
	53.5066	447.218	22.9959
	53.4983	447.217	22.9966
	53.49	447.214	22.9889
	53.4816	447.212	22.9842
	53.4733	447.21	22.9795
	53.4647	447.204	22.965
	53.4564	447.205	22.9705
	53.4479	447.202	22.9629
	53.4397	447.203	22.9703
	53.4313	447.201	22.9681
	53.4229	447.2	22.9694
	53.4151	447.204	22.9857
	53.4069	447.203	22.9892
	53.3986	447.203	22.99
	53.3908	447.205	23.003
	53.3822	447.202	22.9957
	53.3739	447.201	22.9959
	53.3658	447.201	23.0003
	53.3575	447.2	23
	53.3487	447.196	22.9883
	53.3409	447.197	22.9982
	53.3321	447.194	22.9888
	53.3232	447.19	22.9786
	53.3149	447.189	22.9791
	53.3064	447.187	22.9766
	53.2979	447.186	22.9753
	53.2899	447.186	22.9802
	53.2808	447.181	22.9684
	53.2721	447.179	22.9639
	53.2634	447.177	22.96
	53.2544	447.173	22.9515
	53.2455	447.171	22.9462
	53.2369	447.169	22.9433
	53.2284	447.168	22.943
	53.2196	447.165	22.9391
	53.2107	447.163	22.9332
	53.2028	447.163	22.9397
	53.1937	447.16	22.9326
	53.1852	447.159	22.9321
	53.1778	447.161	22.9424
	53.1691	447.159	22.9396
	53.1608	447.158	22.9407
	53.1531	447.159	22.9472
	53.146	447.161	22.9579
	53.1376	447.16	22.9581
	53.1278	447.155	22.9464
	53.1192	447.154	22.9444
	53.1114	447.154	22.9496
	53.1027	447.152	22.9472
	53.0929	447.148	22.9362
	53.0873	447.153	22.9571
	53.0828	447.16	22.9861
	53.0744	447.159	22.9848
	53.0667	447.159	22.989
	53.0606	447.162	23.0044
	53.0523	447.161	23.0041
	53.0445	447.161	23.0066
	53.0371	447.162	23.0125
	53.0285	447.16	23.0098
	53.0202	447.159	23.0097
	53.0107	447.155	23.0013
	53.0016	447.153	22.9962
	52.995	447.154	23.006
	52.9856	447.151	22.9991
	52.9776	447.151	23.0009
	52.9677	447.147	22.9913
	52.9596	447.146	22.9921
	52.9521	447.146	22.9962
	52.9421	447.142	22.9867
	52.9292	447.134	22.9614
	52.9222	447.135	22.9686
	52.9127	447.132	22.9625
	52.9028	447.128	22.9547
	52.8945	447.127	22.9549
	52.8843	447.123	22.9452
	52.8744	447.12	22.9377
	52.8632	447.115	22.924
	52.8532	447.111	22.9162
	52.8391	447.102	22.8895
	52.8287	447.098	22.8802
	52.8184	447.095	22.8722
	52.8089	447.093	22.8681
	52.7971	447.087	22.8532
	52.7865	447.083	22.8443
	52.7749	447.078	22.8309
	52.7655	447.076	22.8279
	52.7572	447.075	22.8296
	52.7441	447.069	22.8106
	52.7332	447.064	22.801
	52.7219	447.06	22.7904
	52.7116	447.057	22.7841
	52.7063	447.06	22.7984
	52.6964	447.058	22.7938
	52.6886	447.058	22.7976
	52.6766	447.053	22.7848
	52.6638	447.047	22.7688
	52.653	447.043	22.7613
	52.643	447.041	22.7569
	52.6341	447.04	22.7566
	52.6253	447.038	22.757
	52.6122	447.032	22.7411
	52.6035	447.031	22.7418
	52.5965	447.032	22.7488
	52.5875	447.031	22.7485
	52.579	447.03	22.7499
	52.5691	447.028	22.7461
	52.5677	447.035	22.7726
	52.5519	447.026	22.7481
	52.5437	447.026	22.7504
	54.8298	447.331	22.756
	54.8269	447.326	22.7403
	54.812	447.328	22.7552
	54.8038	447.326	22.7529
	54.7907	447.327	22.7635
	54.7819	447.326	22.7628
	54.7676	447.328	22.7768
	54.761	447.325	22.7703
	54.7502	447.325	22.7751
	54.7428	447.323	22.7706
	54.7275	447.326	22.7879
	54.7163	447.326	22.7939
	54.7068	447.325	22.7955
	54.694	447.326	22.8062
	54.6864	447.324	22.8025
	54.6767	447.324	22.8046
	54.6654	447.324	22.8114
	54.6554	447.323	22.8145
	54.6414	447.326	22.8293
	54.6245	447.33	22.853
	54.5716	447.358	22.9828
	54.5625	447.357	22.9846
	54.5527	447.357	22.989
	54.544	447.356	22.9896
	54.5338	447.356	22.9951
	54.5287	447.353	22.9851
	54.517	447.354	22.9951
	54.5089	447.353	22.994
	54.5011	447.351	22.9923
	54.4938	447.349	22.9886
	54.4888	447.346	22.9778
	54.4845	447.342	22.9644
	54.4737	447.342	22.9721
	54.4622	447.343	22.9819
	54.4569	447.34	22.9714
	54.4461	447.34	22.9792
	54.4455	447.333	22.9529
	54.4342	447.334	22.9624
	54.4227	447.336	22.9727
	54.4135	447.335	22.9754
	54.4042	447.335	22.9784
	54.392	447.337	22.9915
	54.3808	447.338	23.0015
	54.3697	447.339	23.0112
	54.3633	447.336	23.0043
	54.3558	447.335	23.0012
	54.3486	447.333	22.9968
	54.341	447.331	22.9937
	54.3308	447.331	23.0008
	54.3222	447.33	23.0016
	54.3158	447.327	22.9939
	54.3066	447.327	22.9969
	54.2996	447.325	22.9917
	54.2919	447.323	22.989
	54.2835	447.322	22.9891
	54.2749	447.321	22.9898
	54.2627	447.324	23.0052
	54.2544	447.322	23.0052
	54.2473	447.32	22.9997
	54.2354	447.323	23.0147
	54.2284	447.32	23.0094
	54.2218	447.317	23.0017
	54.2114	447.318	23.0107
	54.2048	447.315	23.0028
	54.1964	447.314	23.0031
	54.1884	447.313	23.0014
	54.1794	447.313	23.0046
	54.1717	447.311	23.0013
	54.162	447.311	23.0075
	54.1541	447.309	23.0055
	54.1436	447.311	23.0158
	54.1355	447.31	23.015
	54.1266	447.309	23.0181
	54.118	447.309	23.0195
	54.1121	447.304	23.0068
	54.103	447.304	23.0108
	54.0937	447.304	23.0161
	54.0845	447.305	23.0208
	54.0741	447.306	23.0321
	54.0647	447.307	23.0388
	54.0565	447.306	23.0383
	54.0483	447.304	23.0378
	54.0419	447.301	23.0275
	54.0352	447.297	23.0184
	54.0256	447.298	23.0257
	54.018	447.296	23.022
	54.0103	447.294	23.0181
	54.0005	447.295	23.0278
	53.9929	447.293	23.023
	53.986	447.29	23.0144
	53.9759	447.292	23.0258
	53.9688	447.289	23.0183
	53.9599	447.289	23.0221
	53.9499	447.291	23.0343
	53.9419	447.289	23.0328
	53.9341	447.287	23.0295
	53.925	447.288	23.035
	53.9175	447.285	23.0298
	53.9085	447.285	23.0354
	53.9	447.285	23.0374
	53.8928	447.282	23.0289
	53.8856	447.279	23.0208
	53.8777	447.277	23.0175
	53.8693	447.276	23.0185
	53.8605	447.276	23.0229
	53.8528	447.273	23.0177
	53.8445	447.272	23.0175
	53.8361	447.271	23.0184
	53.8274	447.271	23.0225
	53.819	447.271	23.0245
	53.8105	447.27	23.0267
	53.8025	447.268	23.0232
	53.7945	447.267	23.0203
	53.7861	447.266	23.0219
	53.7781	447.264	23.0191
	53.7698	447.263	23.0193
	53.7618	447.261	23.0166
	53.7532	447.261	23.0201
	53.7454	447.259	23.0143
	53.7379	447.254	23.0028
	53.7286	447.257	23.017
	53.7204	447.256	23.0155
	53.7124	447.254	23.0122
	53.7042	447.252	23.0107
	53.6961	447.25	23.0077
	53.6875	447.25	23.0118
	53.6798	447.246	23.001
	53.6712	447.247	23.0075
	53.6627	447.247	23.0112
	53.6548	447.244	23.0036
	53.6467	447.241	22.9989
	53.6381	447.242	23.0042
	53.6301	447.239	22.9977
	53.6216	447.239	23.0021
	53.6134	447.237	22.9982
	53.6052	447.235	22.9946
	53.5969	447.234	22.995
	53.5883	447.235	23.0039
	53.5799	447.235	23.0074
	53.5716	447.234	23.0063
	53.5632	447.235	23.0139
	53.5552	447.229	22.9974
	53.5468	447.23	23.0032
	53.5385	447.229	23.0051
	53.5301	447.23	23.013
	53.5219	447.227	23.0071
	53.5136	447.225	23.0005
	53.5053	447.222	22.9945
	53.497	447.22	22.9911
	53.4887	447.22	22.9948
	53.4803	447.217	22.987
	53.4719	447.215	22.9858
	53.4634	447.21	22.9696
	53.4551	447.21	22.9752
	53.4465	447.206	22.9649
	53.4381	447.205	22.9628
	53.4297	447.204	22.9642
	53.4215	447.205	22.9725
	53.4133	447.205	22.9759
	53.4053	447.207	22.9874
	53.3972	447.208	22.9939
	53.389	447.207	22.9962
	53.3805	447.205	22.9911
	53.3726	447.207	23.002
	53.3644	447.206	23.0026
	53.3562	447.205	23.0047
	53.3472	447.2	22.9906
	53.339	447.2	22.9926
	53.3303	447.197	22.9868
	53.3218	447.195	22.9832
	53.3127	447.19	22.971
	53.305	447.192	22.982
	53.296	447.188	22.9712
	53.2876	447.187	22.9715
	53.2785	447.183	22.9616
	53.2704	447.183	22.9642
	53.2623	447.183	22.9677
	53.2528	447.178	22.9542
	53.2439	447.175	22.9485
	53.2355	447.174	22.9485
	53.2272	447.173	22.9494
	53.2182	447.171	22.9432
	53.2086	447.166	22.931
	53.2004	447.166	22.9336
	53.1912	447.163	22.9262
	53.184	447.165	22.9389
	53.1758	447.165	22.9413
	53.1676	447.164	22.9432
	53.1592	447.163	22.9431
	53.1515	447.164	22.9498
	53.1451	447.168	22.9671
	53.1362	447.165	22.9631
	53.1265	447.161	22.9519
	53.1185	447.161	22.9552
	53.1103	447.16	22.9569
	53.1025	447.16	22.9613
	53.0926	447.156	22.9499
	53.0868	447.16	22.9688
	53.0806	447.164	22.9848
	53.0724	447.163	22.9855
	53.0643	447.162	22.9867
	53.0579	447.165	23.0001
	53.0498	447.164	23.0014
	53.0433	447.167	23.0132
	53.0356	447.167	23.0168
	53.0265	447.164	23.011
	53.018	447.162	23.0092
	53.0089	447.16	23.0036
	53.0012	447.16	23.0074
	52.9938	447.16	23.0124
	52.9851	447.158	23.0098
	52.976	447.156	23.0047
	52.966	447.152	22.9946
	52.9582	447.151	22.9969
	52.9494	447.149	22.994
	52.94	447.146	22.9878
	52.931	447.144	22.9842
	52.9204	447.139	22.9719
	52.912	447.138	22.9714
	52.902	447.135	22.9626
	52.8938	447.134	22.9632
	52.8833	447.129	22.9523
	52.8724	447.125	22.94
	52.8615	447.12	22.9275
	52.8538	447.12	22.9313
	52.8415	447.113	22.9128
	52.8285	447.106	22.8912
	52.8186	447.103	22.8847
	52.8076	447.098	22.8736
	52.7964	447.094	22.8616
	52.7869	447.091	22.8575
	52.775	447.086	22.843
	52.7639	447.081	22.8321
	52.7555	447.081	22.8332
	52.7439	447.076	22.8208
	52.7338	447.073	22.8148
	52.7207	447.066	22.7966
	52.7101	447.063	22.789
	52.7061	447.068	22.8087
	52.6969	447.066	22.8066
	52.6834	447.059	22.7878
	52.6772	447.061	22.798
	52.6658	447.057	22.7877
	52.6498	447.047	22.7595
	52.642	447.047	22.7635
	52.6328	447.046	22.7623
	52.6271	447.048	22.7742
	52.6131	447.041	22.755
	52.6066	447.043	22.7639
	52.5946	447.038	22.7521
	52.5866	447.038	22.7556
	52.5793	447.038	22.7611
	52.5687	447.035	22.7551
	52.5608	447.035	22.7585
	52.5527	447.035	22.7613
	52.5438	447.034	22.7608
	54.8371	447.332	22.7382
	54.8281	447.331	22.7379
	54.814	447.333	22.7505
	54.8071	447.33	22.745
	54.791	447.333	22.7632
	54.7762	447.335	22.7785
	54.7665	447.334	22.7803
	54.7572	447.333	22.7809
	54.7507	447.331	22.7744
	54.7412	447.33	22.7756
	54.7259	447.332	22.7928
	54.7197	447.33	22.7852
	54.7123	447.327	22.7809
	54.6962	447.331	22.8006
	54.6853	447.331	22.8061
	54.6788	447.328	22.7992
	54.6665	447.329	22.8088
	54.6577	447.328	22.8086
	54.6436	447.33	22.8236
	54.6276	447.333	22.8442
	54.5764	447.36	22.9689
	54.563	447.362	22.9837
	54.5545	447.361	22.9838
	54.544	447.361	22.9899
	54.5362	447.36	22.988
	54.5278	447.359	22.9878
	54.5174	447.359	22.9939
	54.5093	447.358	22.9932
	54.5024	447.355	22.9883
	54.4956	447.353	22.9832
	54.4891	447.351	22.977
	54.4867	447.345	22.9575
	54.4744	447.347	22.9699
	54.4658	447.346	22.9702
	54.4597	447.343	22.9625
	54.4506	447.342	22.9646
	54.4439	447.34	22.9585
	54.4353	447.339	22.9589
	54.4236	447.34	22.9698
	54.4155	447.339	22.9686
	54.4028	447.341	22.9832
	54.3896	447.344	23.0003
	54.3801	447.344	23.0043
	54.3704	447.344	23.009
	54.3637	447.341	23.003
	54.3573	447.338	22.9957
	54.3489	447.337	22.9956
	54.3404	447.336	22.996
	54.3335	447.334	22.9907
	54.3244	447.333	22.9931
	54.3174	447.331	22.9879
	54.3098	447.329	22.9848
	54.3022	447.328	22.9817
	54.2939	447.326	22.981
	54.2853	447.325	22.9818
	54.276	447.325	22.9855
	54.2654	447.326	22.9943
	54.2554	447.327	23.001
	54.2486	447.324	22.9943
	54.2373	447.326	23.0069
	54.2313	447.322	22.9969
	54.2234	447.321	22.9949
	54.2134	447.321	23.002
	54.2062	447.319	22.9967
	54.2001	447.315	22.9863
	54.1904	447.316	22.9923
	54.1832	447.313	22.987
	54.174	447.313	22.9905
	54.1637	447.314	22.9996
	54.1556	447.313	22.9987
	54.1453	447.314	23.0077
	54.1369	447.313	23.0081
	54.1293	447.311	23.0044
	54.1214	447.309	23.0021
	54.112	447.31	23.0076
	54.1018	447.311	23.0175
	54.0945	447.309	23.0121
	54.0855	447.308	23.0158
	54.0772	447.307	23.0156
	54.0674	447.308	23.0235
	54.059	447.307	23.0245
	54.0512	447.305	23.0216
	54.0425	447.305	23.0238
	54.0354	447.302	23.0171
	54.0262	447.302	23.0225
	54.0188	447.3	23.0168
	54.0108	447.299	23.0154
	54.0019	447.298	23.0191
	53.9947	447.296	23.012
	53.9868	447.294	23.009
	53.976	447.297	23.0252
	53.9684	447.295	23.0212
	53.9609	447.292	23.0156
	53.9517	447.293	23.0217
	53.9427	447.293	23.027
	53.9344	447.292	23.0272
	53.9266	447.29	23.0238
	53.9184	447.289	23.0234
	53.9099	447.288	23.0246
	53.9021	447.286	23.0212
	53.8945	447.283	23.0156
	53.8864	447.282	23.0138
	53.8788	447.279	23.0082
	53.8698	447.28	23.0146
	53.8612	447.279	23.0169
	53.8539	447.276	23.0083
	53.8455	447.275	23.0093
	53.8379	447.272	23.0018
	53.8286	447.274	23.0117
	53.8201	447.273	23.0131
	53.8118	447.272	23.0132
	53.8028	447.273	23.021
	53.7945	447.272	23.0212
	53.7867	447.27	23.0163
	53.7785	447.268	23.0146
	53.77	447.268	23.0175
	53.7625	447.264	23.008
	53.754	447.264	23.0109
	53.7459	447.262	23.0082
	53.738	447.26	23.0029
	53.729	447.261	23.0121
	53.7213	447.258	23.0039
	53.7125	447.258	23.0106
	53.7044	447.257	23.0078
	53.6966	447.254	23.0001
	53.6881	447.253	23.0031
	53.6801	447.251	22.9974
	53.6717	447.25	22.9991
	53.6629	447.251	23.0079
	53.655	447.248	22.9997
	53.6468	447.246	22.9976
	53.6385	447.245	22.9978
	53.6301	447.245	22.9992
	53.6221	447.241	22.9901
	53.6136	447.241	22.9948
	53.6053	447.24	22.9954
	53.597	447.239	22.9931
	53.5887	447.237	22.9925
	53.5801	447.24	23.0049
	53.5719	447.237	23.0007
	53.5635	447.238	23.0057
	53.5554	447.234	22.9946
	53.547	447.233	22.997
	53.5387	447.233	23.002
	53.5304	447.232	22.9993
	53.5221	447.231	22.9996
	53.5138	447.228	22.9934
	53.5055	447.225	22.9871
	53.4971	447.223	22.983
	53.4888	447.224	22.9905
	53.4804	447.219	22.9776
	53.4721	447.22	22.9844
	53.4635	447.214	22.9674
	53.4552	447.214	22.9701
	53.4466	447.21	22.9606
	53.4383	447.21	22.9627
	53.4298	447.208	22.9599
	53.4216	447.209	22.9662
	53.4136	447.211	22.9799
	53.4052	447.21	22.9796
	53.3971	447.211	22.9857
	53.3887	447.209	22.9837
	53.3805	447.209	22.988
	53.3724	447.209	22.9917
	53.3642	447.209	22.9936
	53.3558	447.207	22.993
	53.3471	447.204	22.9851
	53.3388	447.203	22.9856
	53.3304	447.202	22.9845
	53.3218	447.199	22.9788
	53.3128	447.195	22.9686
	53.3046	447.195	22.9719
	53.2961	447.193	22.969
	53.2873	447.19	22.9632
	53.2787	447.188	22.9601
	53.2704	447.188	22.9616
	53.2614	447.184	22.9532
	53.2526	447.182	22.9485
	53.244	447.18	22.9463
	53.2364	447.182	22.9555
	53.2272	447.178	22.9463
	53.2181	447.175	22.9383
	53.2087	447.171	22.9286
	53.2005	447.17	22.9308
	53.1917	447.169	22.928
	53.1842	447.17	22.937
	53.1765	447.171	22.9448
	53.1673	447.168	22.9375
	53.1606	447.171	22.9527
	53.1513	447.168	22.9449
	53.1439	447.169	22.9539
	53.1362	447.17	22.9596
	53.1264	447.165	22.9479
	53.1185	447.165	22.9518
	53.1104	447.165	22.9547
	53.1018	447.163	22.9524
	53.0939	447.163	22.9566
	53.0868	447.165	22.9658
	53.0799	447.167	22.9766
	53.0719	447.167	22.979
	53.0631	447.164	22.9754
	53.0578	447.169	22.9967
	53.0501	447.169	23.0005
	53.041	447.167	22.9947
	53.0356	447.171	23.0137
	53.0258	447.167	23.0039
	53.0186	447.168	23.0105
	53.0085	447.164	22.9989
	53.0002	447.162	22.9985
	52.9937	447.164	23.009
	52.9844	447.162	23.0029
	52.9753	447.159	22.9978
	52.9662	447.156	22.9926
	52.9587	447.157	22.9974
	52.9493	447.154	22.9909
	52.9405	447.152	22.9878
	52.9317	447.15	22.9854
	52.9217	447.146	22.9758
	52.9136	447.145	22.977
	52.9026	447.14	22.9629
	52.8947	447.14	22.9653
	52.8834	447.134	22.9504
	52.8748	447.133	22.9491
	52.8626	447.126	22.9303
	52.8549	447.126	22.934
	52.8443	447.122	22.9235
	52.831	447.114	22.9002
	52.8182	447.107	22.8799
	52.8075	447.103	22.87
	52.7987	447.102	22.869
	52.7885	447.098	22.8618
	52.7762	447.092	22.8451
	52.7676	447.091	22.8453
	52.7572	447.088	22.8376
	52.7474	447.085	22.8328
	52.7335	447.078	22.8102
	52.7224	447.073	22.8003
	52.7122	447.07	22.7942
	52.7041	447.07	22.7973
	52.6931	447.066	22.7878
	52.6849	447.066	22.7904
	52.6788	447.068	22.8011
	52.6659	447.062	22.7846
	52.6522	447.055	22.7653
	52.6428	447.053	22.7631
	52.6339	447.052	22.7631
	52.6283	447.055	22.7754
	52.6175	447.051	22.7682
	52.6053	447.046	22.7556
	52.5968	447.046	22.7569
	52.5884	447.045	22.7588
	52.5815	447.046	22.7658
	52.5711	447.043	22.7603
	52.5606	447.04	22.7542
	52.5519	447.039	22.7548
	52.5432	447.038	22.7554
	54.8412	447.332	22.7252
	54.8323	447.33	22.7246
	54.8133	447.335	22.75
	54.8053	447.333	22.7472
	54.7981	447.331	22.7422
	54.7825	447.333	22.7593
	54.7718	447.333	22.7638
	54.7597	447.334	22.7718
	54.751	447.332	22.7712
	54.7438	447.33	22.7663
	54.73	447.332	22.7792
	54.7247	447.328	22.769
	54.7145	447.328	22.7725
	54.698	447.331	22.7933
	54.6895	447.33	22.7919
	54.6802	447.329	22.793
	54.6673	447.33	22.8042
	54.6555	447.331	22.8124
	54.6421	447.333	22.8255
	54.631	447.333	22.8319
	54.6143	447.337	22.855
	54.5636	447.364	22.979
	54.5582	447.36	22.9699
	54.5471	447.361	22.9776
	54.5392	447.36	22.9762
	54.5313	447.358	22.9745
	54.5207	447.359	22.9809
	54.5123	447.357	22.981
	54.5023	447.357	22.9861
	54.498	447.353	22.9731
	54.4897	447.352	22.9724
	54.4859	447.348	22.9576
	54.4784	447.346	22.9544
	54.4679	447.346	22.9611
	54.4604	447.344	22.9576
	54.4511	447.344	22.9605
	54.4463	447.34	22.9482
	54.4369	447.34	22.9511
	54.4269	447.34	22.9563
	54.415	447.341	22.968
	54.4035	447.343	22.9786
	54.3908	447.345	22.9937
	54.38	447.346	23.0022
	54.3718	447.345	23.0018
	54.3659	447.342	22.9929
	54.3598	447.339	22.9846
	54.3507	447.338	22.987
	54.3418	447.337	22.9891
	54.3332	447.337	22.9899
	54.3264	447.334	22.9838
	54.3195	447.332	22.9781
	54.3108	447.331	22.9789
	54.3029	447.329	22.9773
	54.2953	447.327	22.9737
	54.2867	447.326	22.9746
	54.2779	447.326	22.976
	54.2675	447.327	22.9844
	54.2578	447.327	22.9896
	54.2495	447.326	22.9894
	54.2408	447.325	22.9905
	54.2321	447.324	22.992
	54.2247	447.322	22.9879
	54.2162	447.321	22.9885
	54.2073	447.32	22.9906
	54.2018	447.316	22.9779
	54.1925	447.316	22.9819
	54.1829	447.316	22.9877
	54.1761	447.313	22.98
	54.1635	447.317	23
	54.1564	447.315	22.9942
	54.1463	447.316	23.0022
	54.1381	447.314	23.0019
	54.1301	447.313	23.0002
	54.1219	447.312	22.9994
	54.1142	447.31	22.996
	54.1044	447.311	23.0037
	54.0965	447.309	23.0012
	54.0878	447.308	23.0033
	54.0773	447.31	23.015
	54.0696	447.308	23.0121
	54.0606	447.308	23.0155
	54.0532	447.306	23.0108
	54.0443	447.306	23.0142
	54.0378	447.302	23.004
	54.028	447.303	23.0125
	54.0223	447.298	22.997
	54.0124	447.299	23.0067
	54.0036	447.299	23.0097
	53.9958	447.297	23.0061
	53.9875	447.296	23.0065
	53.9781	447.297	23.0135
	53.9694	447.296	23.0161
	53.9617	447.294	23.0121
	53.9532	447.293	23.0135
	53.9441	447.294	23.0194
	53.9362	447.292	23.0166
	53.9273	447.292	23.0217
	53.9199	447.29	23.015
	53.9122	447.287	23.0106
	53.9026	447.289	23.021
	53.8952	447.286	23.0139
	53.8879	447.283	23.0062
	53.8798	447.281	23.0043
	53.8716	447.28	23.0036
	53.8637	447.278	23.0003
	53.8557	447.276	22.9972
	53.848	447.274	22.9918
	53.8389	447.275	22.9989
	53.8305	447.274	22.9996
	53.8223	447.272	22.9983
	53.8134	447.273	23.0046
	53.8053	447.271	23.0025
	53.7967	447.271	23.0054
	53.7878	447.272	23.0124
	53.7806	447.267	22.9998
	53.7723	447.266	23.0001
	53.7644	447.264	22.9957
	53.7553	447.265	23.0048
	53.7475	447.263	22.998
	53.7398	447.26	22.9911
	53.7307	447.261	23.0009
	53.7224	447.26	23.0015
	53.7142	447.259	23.0001
	53.7061	447.257	22.9967
	53.6981	447.254	22.9913
	53.6897	447.254	22.9934
	53.6815	447.252	22.9916
	53.6733	447.25	22.9887
	53.6648	447.25	22.9924
	53.6565	447.249	22.9917
	53.6486	447.246	22.9838
	53.6404	447.244	22.9789
	53.6318	447.245	22.9871
	53.6235	447.243	22.985
	53.6154	447.24	22.9792
	53.6068	447.241	22.9857
	53.5986	447.239	22.9826
	53.5901	447.24	22.9896
	53.5816	447.241	22.9971
	53.5734	447.238	22.9915
	53.565	447.239	22.9984
	53.5569	447.235	22.9863
	53.5485	447.234	22.9891
	53.5402	447.233	22.9897
	53.532	447.23	22.9817
	53.5236	447.23	22.984
	53.5153	447.229	22.9867
	53.507	447.225	22.9761
	53.4986	447.224	22.9748
	53.4903	447.226	22.985
	53.4819	447.222	22.9752
	53.4736	447.22	22.9712
	53.465	447.215	22.9575
	53.4567	447.215	22.9632
	53.4481	447.211	22.9502
	53.4398	447.211	22.9557
	53.4313	447.209	22.9495
	53.423	447.208	22.9522
	53.4149	447.21	22.9641
	53.4067	447.211	22.9691
	53.3984	447.21	22.9697
	53.3904	447.211	22.98
	53.382	447.209	22.9771
	53.374	447.211	22.9869
	53.3654	447.208	22.9803
	53.3571	447.207	22.9803
	53.3486	447.205	22.9767
	53.3401	447.203	22.972
	53.3319	447.203	22.9759
	53.3231	447.199	22.9669
	53.3143	447.196	22.9588
	53.3061	447.196	22.9617
	53.2973	447.193	22.9559
	53.2893	447.193	22.9608
	53.28	447.189	22.9485
	53.2714	447.187	22.9456
	53.2634	447.187	22.9499
	53.2541	447.183	22.9386
	53.2459	447.182	22.9416
	53.2374	447.181	22.9402
	53.2283	447.178	22.9326
	53.2193	447.175	22.9261
	53.2103	447.172	22.9206
	53.2015	447.17	22.9162
	53.1929	447.168	22.9155
	53.1853	447.17	22.9238
	53.1778	447.171	22.9336
	53.1695	447.17	22.9341
	53.1613	447.17	22.9362
	53.1524	447.168	22.9321
	53.1453	447.17	22.9436
	53.1381	447.172	22.9537
	53.1282	447.167	22.9411
	53.1191	447.164	22.9357
	53.1116	447.165	22.9424
	53.1037	447.165	22.9465
	53.0947	447.163	22.942
	53.0883	447.166	22.9572
	53.0815	447.168	22.9683
	53.0735	447.168	22.9709
	53.0653	447.167	22.9719
	53.0592	447.17	22.9871
	53.0499	447.167	22.9803
	53.0435	447.17	22.9929
	53.0366	447.171	23.0023
	53.0266	447.167	22.9907
	53.0203	447.169	23.0028
	53.0102	447.165	22.9914
	53.0015	447.163	22.9884
	52.9951	447.165	22.9995
	52.9857	447.162	22.9926
	52.9771	447.16	22.9906
	52.9678	447.158	22.9846
	52.9592	447.156	22.9829
	52.9507	447.155	22.9816
	52.9416	447.152	22.9767
	52.9334	447.151	22.9772
	52.9228	447.146	22.9647
	52.9152	447.146	22.9683
	52.9043	447.141	22.9549
	52.8951	447.139	22.9504
	52.8849	447.135	22.9411
	52.8752	447.132	22.9345
	52.8646	447.128	22.9233
	52.8557	447.126	22.9208
	52.8449	447.122	22.9093
	52.8332	447.116	22.8938
	52.8208	447.109	22.8754
	52.8109	447.106	22.8691
	52.8012	447.104	22.864
	52.7905	447.1	22.8543
	52.7799	447.096	22.8451
	52.77	447.093	22.8395
	52.7624	447.093	22.8441
	52.7486	447.085	22.8215
	52.7374	447.081	22.8107
	52.7255	447.076	22.7972
	52.7155	447.073	22.792
	52.7064	447.072	22.7904
	52.6939	447.066	22.7748
	52.6846	447.064	22.7731
	52.6803	447.069	22.7912
	52.6677	447.063	22.7759
	52.6567	447.059	22.7671
	52.6433	447.052	22.7491
	52.6391	447.057	22.7672
	52.6291	447.054	22.7628
	52.6174	447.05	22.7518
	52.6047	447.044	22.7375
	52.5986	447.046	22.7478
	52.5911	447.047	22.7527
	52.5837	447.047	22.7581
	52.5722	447.043	22.7484
	52.5646	447.043	22.7529
	52.5549	447.041	22.7501
	52.548	447.042	22.7568
	54.8419	447.331	22.717
	54.8244	447.334	22.7383
	54.8212	447.33	22.7233
	54.8067	447.331	22.737
	54.7941	447.332	22.7463
	54.7825	447.333	22.753
	54.7729	447.332	22.7545
	54.7651	447.33	22.7512
	54.7543	447.33	22.7557
	54.7449	447.329	22.7568
	54.7315	447.33	22.7687
	54.7229	447.329	22.7675
	54.714	447.328	22.7673
	54.6988	447.33	22.7846
	54.6899	447.329	22.7844
	54.6808	447.328	22.785
	54.6702	447.328	22.7895
	54.6554	447.331	22.8064
	54.6475	447.329	22.8034
	54.6342	447.33	22.8164
	54.5754	447.362	22.9623
	54.5637	447.363	22.9718
	54.554	447.363	22.9755
	54.5476	447.361	22.9697
	54.5397	447.359	22.968
	54.5309	447.358	22.969
	54.5201	447.359	22.9763
	54.5133	447.357	22.9712
	54.5041	447.356	22.9737
	54.4978	447.354	22.9671
	54.4899	447.352	22.9655
	54.4883	447.346	22.9436
	54.4818	447.343	22.9371
	54.4654	447.348	22.9627
	54.4596	447.345	22.9542
	54.4532	447.342	22.9472
	54.4465	447.34	22.9414
	54.4369	447.34	22.945
	54.4282	447.339	22.9458
	54.4167	447.34	22.956
	54.4037	447.343	22.9718
	54.3916	447.345	22.9847
	54.3843	447.343	22.9808
	54.3745	447.343	22.9859
	54.367	447.341	22.9827
	54.3606	447.338	22.9754
	54.3512	447.338	22.9792
	54.3409	447.338	22.9863
	54.335	447.335	22.977
	54.3258	447.335	22.9802
	54.319	447.332	22.9738
	54.3128	447.329	22.9656
	54.3034	447.329	22.9693
	54.2947	447.328	22.9705
	54.2885	447.325	22.9615
	54.2791	447.325	22.9656
	54.2678	447.326	22.9774
	54.2585	447.326	22.9809
	54.2489	447.326	22.986
	54.2404	447.325	22.9868
	54.2329	447.323	22.9831
	54.2267	447.32	22.9738
	54.2152	447.322	22.9873
	54.2097	447.318	22.9749
	54.2031	447.315	22.9667
	54.1929	447.316	22.9748
	54.184	447.316	22.9772
	54.1761	447.314	22.975
	54.1662	447.315	22.982
	54.1577	447.314	22.9828
	54.1474	447.315	22.9921
	54.1391	447.314	22.9916
	54.1315	447.312	22.9883
	54.1229	447.311	22.9896
	54.1148	447.31	22.9883
	54.1056	447.31	22.9929
	54.0972	447.309	22.9928
	54.0883	447.308	22.9959
	54.0794	447.308	22.9993
	54.0699	447.308	23.0059
	54.0611	447.308	23.0087
	54.0536	447.306	23.0043
	54.0456	447.304	23.0024
	54.0377	447.303	23.0002
	54.0294	447.302	22.9999
	54.0224	447.299	22.992
	54.0131	447.299	22.998
	54.0034	447.3	23.0071
	53.9968	447.296	22.9961
	53.9883	447.296	22.9977
	53.9785	447.297	23.0072
	53.9716	447.294	22.9979
	53.9624	447.294	23.0038
	53.9538	447.294	23.0064
	53.9452	447.293	23.0086
	53.9376	447.291	23.0035
	53.9281	447.292	23.0128
	53.9203	447.29	23.0093
	53.9122	447.289	23.008
	53.9043	447.287	23.0053
	53.8959	447.286	23.006
	53.8887	447.283	22.9977
	53.8811	447.28	22.992
	53.8728	447.279	22.9917
	53.8646	447.278	22.9902
	53.8558	447.278	22.9951
	53.8484	447.275	22.9868
	53.8398	447.274	22.9897
	53.831	447.274	22.9939
	53.8228	447.273	22.993
	53.8142	447.273	22.9964
	53.8056	447.272	22.9994
	53.7974	447.271	22.9978
	53.7893	447.269	22.9958
	53.781	447.268	22.9962
	53.7725	447.268	22.9987
	53.765	447.265	22.9899
	53.7559	447.266	22.9996
	53.7481	447.263	22.9926
	53.7408	447.259	22.9806
	53.7319	447.26	22.9876
	53.7236	447.259	22.9874
	53.7153	447.257	22.9871
	53.7067	447.258	22.9918
	53.6986	447.256	22.9891
	53.69	447.256	22.9938
	53.6825	447.251	22.9811
	53.6741	447.25	22.9811
	53.6656	447.25	22.9849
	53.6575	447.248	22.9814
	53.6492	447.247	22.9817
	53.6413	447.243	22.971
	53.6327	447.244	22.9783
	53.6244	447.243	22.9778
	53.6163	447.24	22.9717
	53.6077	447.241	22.977
	53.5995	447.239	22.9757
	53.5911	447.238	22.9768
	53.5825	447.24	22.9863
	53.5743	447.238	22.9849
	53.566	447.237	22.985
	53.5578	447.234	22.9766
	53.5494	447.235	22.9824
	53.5411	447.233	22.9813
	53.5328	447.232	22.9822
	53.5245	447.232	22.9839
	53.5162	447.229	22.9762
	53.5079	447.226	22.9699
	53.4996	447.225	22.9716
	53.4913	447.223	22.9683
	53.4829	447.221	22.9633
	53.4745	447.219	22.9606
	53.466	447.214	22.9465
	53.4576	447.213	22.9455
	53.4491	447.21	22.9406
	53.4407	447.21	22.9421
	53.4323	447.208	22.9389
	53.424	447.209	22.9463
	53.4158	447.209	22.9532
	53.4076	447.21	22.9582
	53.3995	447.21	22.964
	53.3913	447.21	22.9681
	53.3831	447.21	22.9732
	53.3746	447.208	22.9685
	53.3665	447.208	22.9729
	53.3581	447.207	22.9709
	53.3495	447.204	22.9643
	53.3411	447.202	22.9636
	53.333	447.202	22.9672
	53.3238	447.197	22.9529
	53.3154	447.196	22.9524
	53.3071	447.195	22.9523
	53.2986	447.193	22.9506
	53.2904	447.193	22.9535
	53.2812	447.189	22.9416
	53.2732	447.189	22.9462
	53.2641	447.185	22.9366
	53.2554	447.183	22.9336
	53.2465	447.18	22.9274
	53.2385	447.181	22.9323
	53.2298	447.179	22.9288
	53.2201	447.173	22.9137
	53.2114	447.172	22.912
	53.2026	447.169	22.9078
	53.1937	447.167	22.9038
	53.1864	447.169	22.9151
	53.1788	447.171	22.9235
	53.1698	447.168	22.918
	53.1626	447.17	22.9292
	53.1536	447.167	22.9241
	53.1463	447.169	22.9343
	53.1386	447.17	22.9403
	53.129	447.166	22.9298
	53.1208	447.165	22.9313
	53.1122	447.163	22.9294
	53.1046	447.164	22.9364
	53.0962	447.163	22.9358
	53.0895	447.166	22.949
	53.0831	447.169	22.9631
	53.0746	447.167	22.9617
	53.066	447.166	22.96
	53.06	447.169	22.9765
	53.0516	447.168	22.9754
	53.0435	447.167	22.9768
	53.0373	447.17	22.9902
	53.0269	447.165	22.9764
	53.0195	447.166	22.982
	53.0093	447.161	22.9692
	53.0027	447.163	22.9798
	52.9959	447.164	22.9887
	52.9875	447.163	22.9879
	52.979	447.161	22.9861
	52.9687	447.157	22.9745
	52.9616	447.158	22.9812
	52.9525	447.155	22.9761
	52.9433	447.153	22.9707
	52.9345	447.151	22.9683
	52.9248	447.147	22.9604
	52.9156	447.145	22.9557
	52.904	447.139	22.9382
	52.8946	447.136	22.9328
	52.8857	447.134	22.93
	52.8763	447.132	22.925
	52.8659	447.128	22.9148
	52.8563	447.125	22.9089
	52.8462	447.121	22.9011
	52.8337	447.114	22.8816
	52.8221	447.109	22.8667
	52.8126	447.106	22.8622
	52.803	447.104	22.8576
	52.7906	447.098	22.8401
	52.78	447.094	22.8309
	52.7716	447.093	22.8322
	52.7635	447.092	22.8343
	52.7515	447.087	22.8197
	52.7351	447.076	22.7864
	52.7262	447.074	22.7854
	52.7138	447.069	22.7702
	52.7091	447.073	22.7871
	52.6961	447.066	22.7698
	52.6852	447.062	22.7609
	52.6816	447.068	22.7822
	52.6721	447.066	22.7791
	52.6534	447.053	22.74
	52.6457	447.053	22.7443
	52.6382	447.053	22.7498
	52.6285	447.051	22.7463
	52.6201	447.05	22.7479
	52.6095	447.047	22.7413
	52.6015	447.047	22.7447
	52.5897	447.043	22.7336
	52.5816	447.042	22.7364
	52.574	447.043	22.741
	52.5657	447.042	22.7431
	52.5539	447.038	22.7326
	52.5433	447.035	22.7266
	54.8378	447.332	22.7215
	54.8317	447.329	22.7139
	54.813	447.334	22.7385
	54.8091	447.33	22.7251
	54.791	447.334	22.7485
	54.7898	447.328	22.728
	54.7692	447.333	22.7582
	54.7623	447.331	22.7528
	54.7502	447.332	22.7609
	54.7433	447.329	22.7555
	54.7328	447.329	22.7595
	54.7226	447.329	22.7627
	54.7128	447.328	22.765
	54.6972	447.331	22.7834
	54.6884	447.33	22.7829
	54.6812	447.327	22.7782
	54.6665	447.33	22.7944
	54.6566	447.329	22.7971
	54.6425	447.332	22.8121
	54.6313	447.332	22.8189
	54.5798	447.359	22.9436
	54.5632	447.364	22.9676
	54.5544	447.363	22.9687
	54.549	447.36	22.9597
	54.5386	447.36	22.9655
	54.531	447.358	22.9629
	54.5227	447.357	22.9626
	54.5103	447.359	22.9746
	54.5054	447.355	22.964
	54.4956	447.355	22.9681
	54.4908	447.351	22.9568
	54.4878	447.346	22.9392
	54.4779	447.346	22.9438
	54.4674	447.346	22.9504
	54.4599	447.345	22.9474
	54.4503	447.344	22.9511
	54.4459	447.34	22.9374
	54.4384	447.338	22.9339
	54.4275	447.339	22.9421
	54.4151	447.341	22.9556
	54.404	447.342	22.9648
	54.3925	447.344	22.9755
	54.3833	447.343	22.9785
	54.3744	447.343	22.9805
	54.3651	447.342	22.9836
	54.3597	447.339	22.9728
	54.3529	447.336	22.967
	54.3421	447.337	22.9759
	54.3355	447.334	22.9692
	54.3269	447.334	22.9699
	54.3191	447.332	22.9679
	54.3106	447.331	22.9681
	54.3015	447.331	22.9711
	54.2929	447.33	22.972
	54.2871	447.326	22.9614
	54.2776	447.326	22.966
	54.2663	447.328	22.9775
	54.2581	447.327	22.9771
	54.2502	447.325	22.9749
	54.2395	447.326	22.9849
	54.2336	447.323	22.9743
	54.2249	447.322	22.9758
	54.2142	447.323	22.9858
	54.2085	447.319	22.9744
	54.2018	447.316	22.9669
	54.1919	447.317	22.9735
	54.1838	447.316	22.9724
	54.1756	447.314	22.9713
	54.165	447.316	22.9819
	54.1568	447.314	22.9811
	54.1476	447.314	22.9852
	54.1382	447.315	22.9904
	54.1298	447.314	22.9906
	54.1213	447.313	22.9917
	54.1148	447.309	22.9825
	54.1052	447.31	22.9892
	54.096	447.31	22.9933
	54.0876	447.309	22.994
	54.0792	447.308	22.9944
	54.0698	447.308	23.0004
	54.0602	447.309	23.008
	54.0536	447.306	22.9985
	54.0453	447.305	22.9986
	54.0374	447.303	22.9962
	54.0284	447.303	23
	54.0221	447.299	22.9885
	54.0132	447.299	22.9918
	54.0037	447.3	22.9995
	53.9963	447.297	22.9938
	53.9881	447.296	22.9933
	53.9793	447.296	22.9964
	53.9713	447.294	22.9946
	53.9621	447.294	23.0006
	53.9536	447.294	23.0019
	53.9454	447.293	23.0014
	53.9372	447.291	23.0012
	53.9285	447.291	23.0041
	53.9204	447.29	23.0031
	53.9122	447.288	23.0022
	53.9039	447.287	23.0026
	53.896	447.286	22.9995
	53.8888	447.282	22.9912
	53.8798	447.283	22.997
	53.8724	447.28	22.9895
	53.8637	447.28	22.9926
	53.856	447.277	22.9873
	53.8477	447.276	22.9878
	53.839	447.276	22.9909
	53.831	447.274	22.9886
	53.8226	447.273	22.9892
	53.8138	447.274	22.9942
	53.8056	447.272	22.9937
	53.7968	447.272	22.9987
	53.7888	447.271	22.9959
	53.7811	447.268	22.9895
	53.7729	447.267	22.9889
	53.7646	447.265	22.9882
	53.7563	447.265	22.9888
	53.7483	447.263	22.9854
	53.7408	447.259	22.9754
	53.732	447.26	22.9819
	53.7231	447.26	22.9888
	53.7154	447.257	22.9809
	53.7069	447.257	22.9831
	53.6987	447.255	22.9827
	53.69	447.256	22.9881
	53.6821	447.253	22.9814
	53.6738	447.252	22.9829
	53.6657	447.25	22.9789
	53.6573	447.249	22.9796
	53.6495	447.245	22.9696
	53.641	447.245	22.9727
	53.6329	447.243	22.9684
	53.6245	447.242	22.9692
	53.6161	447.241	22.9707
	53.6077	447.241	22.9736
	53.5994	447.24	22.9718
	53.5911	447.239	22.9745
	53.5826	447.239	22.9787
	53.5744	447.237	22.9749
	53.5659	447.238	22.983
	53.5578	447.235	22.9739
	53.5494	447.235	22.98
	53.5411	447.235	22.9828
	53.5328	447.233	22.9803
	53.5245	447.233	22.9849
	53.5163	447.23	22.9758
	53.508	447.225	22.9617
	53.4996	447.224	22.9624
	53.4913	447.224	22.9662
	53.483	447.222	22.9628
	53.4746	447.219	22.9551
	53.4661	447.216	22.9487
	53.4578	447.216	22.9523
	53.4492	447.21	22.9366
	53.4408	447.21	22.9387
	53.4324	447.209	22.9377
	53.424	447.208	22.9377
	53.4161	447.211	22.955
	53.4079	447.212	22.96
	53.3997	447.211	22.963
	53.3913	447.21	22.9624
	53.3831	447.21	22.966
	53.3752	447.211	22.9743
	53.3671	447.211	22.9791
	53.3583	447.207	22.9676
	53.3497	447.204	22.9621
	53.3415	447.204	22.9647
	53.3328	447.201	22.9572
	53.3245	447.2	22.9572
	53.3157	447.197	22.951
	53.3073	447.196	22.9498
	53.2984	447.192	22.9414
	53.2906	447.193	22.949
	53.2817	447.19	22.9417
	53.2732	447.188	22.9395
	53.2644	447.186	22.9343
	53.2556	447.183	22.9283
	53.247	447.181	22.9261
	53.2385	447.18	22.9256
	53.2302	447.179	22.9267
	53.2207	447.175	22.9148
	53.2116	447.172	22.9073
	53.2034	447.171	22.9096
	53.1942	447.168	22.9019
	53.1864	447.169	22.9084
	53.1786	447.169	22.9148
	53.1701	447.168	22.914
	53.1621	447.168	22.9181
	53.1541	447.168	22.9224
	53.1473	447.171	22.9362
	53.1395	447.172	22.9414
	53.1291	447.166	22.9244
	53.1209	447.165	22.9258
	53.1133	447.166	22.9327
	53.1052	447.165	22.9348
	53.0958	447.162	22.9265
	53.0899	447.166	22.9454
	53.0833	447.169	22.9586
	53.0754	447.169	22.9613
	53.0666	447.167	22.9583
	53.0603	447.17	22.9723
	53.0518	447.168	22.9703
	53.0437	447.167	22.9718
	53.0389	447.173	22.9948
	53.0282	447.167	22.9787
	53.0205	447.167	22.9817
[truncated: 116,785 more rows]
